# Supplementary material for: Ultrasound characteristics of the mid-portion of the Achilles tendon in runners: a systematic review protocol
Source: Springer Nature journal article supplement (doi:10.1186/s13643-017-0501-z), 2017-05-30
Supplement: MOESM2 [file 12326648]

Additional File 2: Data extraction form

|                                    |                      |   |  |
|------------------------------------|----------------------|---|--|
| Study title                        |                      |   |  |
| Study design                       |                      |   |  |
| Study aim                          |                      |   |  |
| Sample size (n)                    | M                    |   |  |
|                                    | F                    |   |  |
| Participant characteristics        | Age                  | M |  |
|                                    |                      | F |  |
|                                    | Height               | M |  |
|                                    |                      | F |  |
|                                    | Weight               | M |  |
|                                    |                      | F |  |
|                                    | BMI                  | M |  |
|                                    |                      | F |  |
| Ultrasound mode                    |                      |   |  |
| Ultrasound characteristic reported |                      |   |  |
| Ultrasound scoring system          | Quantitative         |   |  |
|                                    | Qualitative          |   |  |
| Ultrasound acquisition             | Machine model        |   |  |
|                                    | Transducer           |   |  |
|                                    | Imaging plane        |   |  |
| Ultrasound outcome measures        | Cross-sectional area |   |  |
|                                    | Thickness            |   |  |
|                                    | Vascularisation      |   |  |
|                                    | Stiffness            |   |  |
| Running type                       | Volume               |   |  |
|                                    | Frequency            |   |  |
|                                    | Intensity            |   |  |
|                                    | Duration             |   |  |
